# Supplementary material for: Development and Validation of a Test for the Classification of Horses as Broken or Unbroken
Source: MDPI journal article supplement (doi:10.3390/ani11082303), 2021-08-04
Supplement: s1 [file s1]

**Table S1.** Housing conditions of the examined horses.

| Parameter                                   | Mean   | Standard<br>Deviation | Median | Minimum | Maximum |
|---------------------------------------------|--------|-----------------------|--------|---------|---------|
| N° horses at the farm                       | 11     | 7                     | 10     | 3       | 25      |
| Size of paddock (m <sup>2</sup> )           | 1774.3 | 2032.5                | 1600.0 | 15.0    | 10000.0 |
| N° horses in the paddock                    | 8      | 7                     | 4      | 1       | 21      |
| Space allowance<br>(m <sup>2</sup> /animal) | 475.0  | 1162.5                | 133.3  | 10.0    | 10000.0 |

**Table S2.** Demographic characteristics of examined horses by farms

| Farm | Sex   |       |        |        | Age (years) |                       |
|------|-------|-------|--------|--------|-------------|-----------------------|
|      | Male  |       | Female |        | Mean        | Standard<br>Deviation |
|      | Count | %     | Count  | %      |             |                       |
| 1    | 1     | 5.0%  | 19     | 95.0%  | 7           | 4                     |
| 2    | 1     | 10.0% | 9      | 90.0%  | 7           | 6                     |
| 3    | 1     | 20.0% | 4      | 80.0%  | 8           | 7                     |
| 4    | 0     | 0.0%  | 9      | 100.0% | 5           | 3                     |
| 5    | 7     | 63.6% | 4      | 36.4%  | 3           | 3                     |
| 6    | 0     | 0.0%  | 3      | 100.0% | 5           | 4                     |
| 7    | 1     | 20.0% | 4      | 80.0%  | 9           | 5                     |
| 8    | 0     | 0.0%  | 12     | 100.0% | 10          | 9                     |
| 9    | 5     | 20.0% | 20     | 80.0%  | 6           | 6                     |

**Table S3.** Descriptive statistics for AHT, HT, and BUT scores and classification of horses, by the blinded observers, according to the definition of ‘unbroken’ in Regulation EC 1/2005.

| Parameter                                                 | Score/<br>classification | Observer |       |     |       |    |       |     |       |
|-----------------------------------------------------------|--------------------------|----------|-------|-----|-------|----|-------|-----|-------|
|                                                           |                          | 1        |       | 2   |       | 3  |       | 4   |       |
|                                                           |                          | N        | %     | N   | %     | N  | %     | N   | %     |
| APPROACHING<br>AND<br>HALTERING                           | 0                        | 64       | 38.8% | 63  | 38.2% | 66 | 40.0% | 63  | 38.2% |
|                                                           | 1                        | 41       | 24.8% | 50  | 30.3% | 34 | 20.6% | 35  | 21.2% |
|                                                           | 2                        | 60       | 36.4% | 52  | 31.5% | 65 | 39.4% | 67  | 40.6% |
| HANDLING                                                  | 0                        | 80       | 48.5% | 74  | 44.8% | 72 | 43.6% | 72  | 43.6% |
|                                                           | 1                        | 68       | 41.2% | 63  | 38.2% | 41 | 24.8% | 67  | 40.6% |
|                                                           | 2                        | 17       | 10.3% | 28  | 17.0% | 52 | 31.5% | 26  | 15.8% |
| BUT score                                                 | 0                        | 64       | 38.8% | 63  | 38.2% | 66 | 40.0% | 63  | 38.2% |
|                                                           | 1                        | 11       | 6.7%  | 7   | 4.2%  | 5  | 3.0%  | 7   | 4.2%  |
|                                                           | 2                        | 34       | 20.6% | 39  | 23.6% | 18 | 10.9% | 26  | 15.8% |
|                                                           | 3                        | 40       | 24.2% | 36  | 21.8% | 36 | 21.8% | 47  | 28.5% |
|                                                           | 4                        | 16       | 9.7%  | 20  | 12.1% | 40 | 24.2% | 22  | 13.3% |
| Classification<br>according to<br>Regulation EC<br>1/2005 | Broken                   | 61       | 37.0% | 40  | 24.2% | 93 | 56.4% | 102 | 61.8% |
|                                                           | Unbroken                 | 104      | 63.0% | 125 | 75.8% | 72 | 43.6% | 63  | 38.2% |

**Table S4.** Factors affecting eye temperature (ET) of horses from the multivariable model including ET as dependent variable.

| Parameter                                  | OR    | 95% Confidence Interval<br>for OR |       | P value |
|--------------------------------------------|-------|-----------------------------------|-------|---------|
|                                            |       | Lower                             | Upper |         |
| BUT score                                  | 1.096 | 0.998                             | 1.204 | 0.054   |
| Temperature (°C)                           | 1.062 | 1.025                             | 1.099 | 0.001   |
| Lux                                        | 1.000 | 1.000                             | 1.000 | 0.086   |
| Distance between camera and horse (meters) | 0.632 | 0.521                             | 0.766 | <0.001  |
| Age (years)                                | 0.981 | 0.961                             | 1.002 | 0.075   |
| Sex (male <i>vs</i> female)                | 0.723 | 0.508                             | 1.029 | 0.072   |

BUT=Broken/Unbroken Test, OR=odds ratio

**Table S5.** Ordinal logistic regression: factors associated with BUT score

| Predictor          | OR    | 95% Confidence Interval for |       | P value |
|--------------------|-------|-----------------------------|-------|---------|
|                    |       | Lower                       | Upper |         |
| HR                 | 0.948 | 0.891                       | 1.009 | 0.093   |
| RR                 | 0.849 | 0.795                       | 0.907 | <0.001  |
| Avoidance distance | -     | -                           | -     | -       |
| ET                 | 1.461 | 0.955                       | 2.235 | 0.081   |
| Approach time      | 0.977 | 0.959                       | 0.996 | 0.015   |
| Haltering time     | 0.978 | 0.968                       | 0.988 | <0.001  |
| Handling time      | 0.967 | 0.954                       | 0.980 | <0.001  |
| Total time         | 0.983 | 0.978                       | 0.989 | <0.001  |

CI=confidence interval, OR=odds ratio. HR=heart rate, RR= respiratory rate, ET= eye temperature.

- not calculable

**Figure S1.** Receiver Operating Characteristic (ROC) curve of BUT score for prediction of broken vs unbroken status in horses

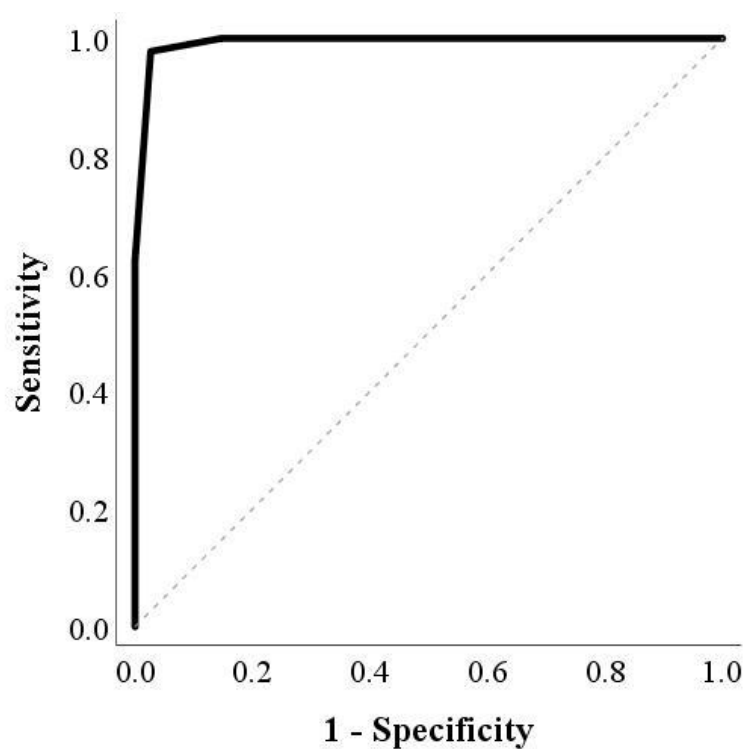

AUC=area under curve, BUT=Broken/Unbroken Test, CI=confidence interval

AUC=0.993, 95% CI=0.984–1.000;  $P<0.001$

Dotted line indicates reference line (AUC=0.50)
